# Supplementary material
Source: ML conference proceedings conference paper supplement (https://openaccess.thecvf.com/content/CVPR2026/html/Zhang_Stable_Mean_Flow_CVPR_2026_paper.html)
Supplement: Supplementary file 1 [file Zhang_Stable_Mean_Flow_CVPR_2026_supplemental.pdf]

# Stable Mean Flow: Lyapunov-Inspired One-Step Flow Matching

## Supplementary Material

### 7. Rationale

#### 7.1. Proof of Theorem 3.1

*Proof.* Fix  $r \in [0, 1)$  and  $t \in (r, 1]$ , and set  $\alpha := t - r > 0$ . By non-expansivity, for any base point  $z_t$  and any perturbation  $\Delta z$  with  $\|\Delta z\| \leq \delta$  we have

$$\begin{aligned} & \|\Delta z - \alpha(u_\theta(z_t + \Delta z, r, t) - u_\theta(z_t, r, t))\| \\ &= \|\phi_r^\theta(t, z_t + \Delta z) - \phi_r^\theta(t, z_t)\|_2 \\ &\leq \|\Delta z\| \end{aligned}$$

If we define

$$\Delta u := u_\theta(z_t + \Delta z, r, t) - u_\theta(z_t, r, t)$$

then the triangle inequality yields

$$\|\alpha \Delta u\| \leq \|\Delta z\| + \|\Delta z - \alpha \Delta u\| \leq 2\|\Delta z\|.$$

Therefore

$$\|u_\theta(z_t + \Delta z, r, t) - u_\theta(z_t, r, t)\| = \|\Delta u\| \leq \frac{2}{\alpha} \|\Delta z\|. \quad (1)$$

Now fix  $t_0 \in (r, 1]$  and consider any compact time interval  $I \subseteq [t_0, 1]$ . For every  $t \in I$  we have  $t - r \geq t_0 - r > 0$ , hence

$$\frac{2}{\alpha} = \frac{2}{t - r} \leq \frac{2}{t_0 - r} \quad \text{for all } t \in I.$$

Thus  $u_\theta(\cdot, r, t)$  is locally Lipschitz in  $z$  with a uniform Lipschitz bound on  $I$ . By construction of the Stable Mean Flow field,  $u_\theta$  is also continuous in  $t$ .

Consequently,  $u_\theta$  is continuous and locally Lipschitz in  $z$  with a uniform Lipschitz constant. By the Picard–Lindelöf theorem, for any initial condition  $(t_0, z_0)$  there exists a unique solution  $z(\cdot)$  of

$$\dot{z}(s) = u_\theta(z(s), r, s), \quad z(t_0) = z_0,$$

on some interval containing  $t_0$  within  $[t_0, 1]$ . Since the above assumptions hold on the whole strip  $K \times [t_0, 1]$ , this solution extends uniquely throughout any subinterval of  $[t_0, 1]$ .

Hence, every initial condition  $(t_0, z_0)$  with  $t_0 \in (r, 1]$  determines a unique trajectory  $z(\cdot)$ , so characteristics of the learned Stable Mean Flow field cannot cross or branch.  $\square$

#### 7.2. Proof of Theorem 3.2

*Proof.* The Jacobian vector product (JVP) formula is

$$\begin{aligned} \frac{d}{dt}u(z_t, r, t) &= \underbrace{\nabla_z u(z_t, r, t)}_{\partial_z u} \cdot \underbrace{\frac{dz_t}{dt}}_{u(z_t, r, t)} + \underbrace{\frac{\partial u(z_t, r, t)}{\partial t}}_{\text{time partial}} \\ &= (\partial_z u) \cdot u(z_t, r, t) + \partial_t u(z_t, r, t). \end{aligned}$$

In addition, from the Lipschitz bound 1, we get

$$\|u_\theta(z_t + \Delta z, r, t) - u_\theta(z_t, r, t)\| \leq \frac{2}{\alpha} \|\Delta z\|.$$

Divide by  $\|\Delta z\|$  and take  $\Delta z \rightarrow 0$ . Since  $u_\theta(\cdot, r, t)$  is  $C^1$  in  $z$ , we then have

$$\|\partial_z u_\theta(z_t, r, t)\| \leq \frac{2}{\alpha}.$$

One of the working assumptions is that the neural network representing  $u_\theta$  is  $C^1$  and defined on a compact set of parameters  $\theta$ . Hence  $\|u_\theta\| \leq M_\theta$  and  $\|\partial_t u_\theta\| \leq \Lambda_\theta$  for some constants  $M_\theta, \Lambda_\theta < \infty$ . This shows that the JVP is bounded by a constant

$$\|(\partial_z u_\theta) \cdot u_\theta + \partial_t u_\theta\| \leq \frac{2}{\alpha} M_\theta + \Lambda_\theta \leq C.$$

$\square$

#### 7.3. Proof of Theorem 3.3

*Proof.* From the definition of  $\phi_r^\theta$ , write

$$V(\Delta z) = \|\Delta z - \alpha \Delta u\|_2 - \|\Delta z\|_2,$$

where

$$\Delta u := u_\theta(z_t + \Delta z, r, t) - u_\theta(z_t, r, t).$$

By the triangle inequality, for any vectors  $a, b$ ,

$$\|a + b\| - \|a\| \leq \|b\|.$$

Applying this with  $a = \Delta z$  and  $b = -\alpha \Delta u$  yields the pointwise bound

$$V(\Delta z) \leq \alpha \|\Delta u\|_2.$$

Since  $\|\Delta z\|_2 \leq \delta$  almost surely when selected from the distribution  $\mathcal{D}_\delta$ , the local Lipschitz bound (1) gives

$$\|\Delta u\|_2 \leq \frac{2}{\alpha} \|\Delta z\|_2,$$

and therefore

$$V(\Delta z) \leq \alpha \cdot \frac{2}{\alpha} \|\Delta z\|_2 = 2\|\Delta z\|_2 \quad (\text{a.s.})$$

Taking expectations gives

$$\mathbb{E}[V(\Delta z)] \leq 2\mathbb{E}\|\Delta z\|_2 \leq 2\delta.$$

For the tail probability, apply Markov's inequality to  $V(\Delta z)$ :

$$\mathbb{P}(V(\Delta z) > \tau) \leq \frac{\mathbb{E}[V(\Delta z)]}{\tau} \leq \frac{2\delta}{\tau} \quad (\tau > 0).$$

This completes the proof.  $\square$

#### 7.4. Proof of Theorem 4.1

*Proof.* Write  $\alpha_t := t - r$  and  $\alpha_{t+\Delta t} := t + \Delta t - r$ . From the oracle identity at  $s = t + \Delta t$  and  $s = t$  we get

$$\alpha_{t+\Delta t} u^*(t + \Delta t, z_{t+\Delta t}) - \alpha_t u^*(t, z_t) = z_{t+\Delta t} - z_t.$$

Hence

$$\begin{aligned} & \alpha_{t+\Delta t} e_{t+\Delta t} - \alpha_t e_t \\ &= \alpha_{t+\Delta t} u_\theta(z_{t+\Delta t}, r, t + \Delta t) - \alpha_t u_\theta(z_t, r, t) - (z_{t+\Delta t} - z_t). \end{aligned}$$

Add and subtract  $\alpha_{t+\Delta t} u_\theta(z_t, r, t + \Delta t)$ , so that  $\alpha_{t+\Delta t} e_{t+\Delta t} - \alpha_t e_t$  becomes

$$\underbrace{(\alpha_{t+\Delta t} u_\theta(z_{t+\Delta t}, r, t + \Delta t) - \alpha_{t+\Delta t} u_\theta(z_t, r, t + \Delta t))}_{(I)} + \underbrace{(\alpha_{t+\Delta t} u_\theta(z_t, r, t + \Delta t) - \alpha_t u_\theta(z_t, r, t))}_{(II)} - (z_{t+\Delta t} - z_t).$$

To handle (I), observe

$$(I) - (z_{t+\Delta t} - z_t) = -(\phi_r^\theta(t + \Delta t, z_{t+\Delta t}) - \phi_r^\theta(t + \Delta t, z_t)),$$

so by non-expansivity of  $\phi_r^\theta$  in  $z$ ,

$$\|(I) - (z_{t+\Delta t} - z_t)\| \leq \|z_{t+\Delta t} - z_t\|.$$

For (II), decompose  $\alpha_{t+\Delta t} = \Delta t + \alpha_t$  to write:

$$(II) = \underbrace{\Delta t u_\theta(z_t, r, t + \Delta t)}_{\text{bounded by } \Delta t M_\theta} + \alpha_t \underbrace{(u_\theta(z_t, r, t + \Delta t) - u_\theta(z_t, r, t))}_{\text{time diff.}}$$

and, by the fundamental theorem of calculus with  $\partial_s u_\theta$  and the assumed bound  $\|\partial_s u_\theta\| \leq \Lambda_\theta$ , we find

$$\begin{aligned} \|u_\theta(z_t, r, t + \Delta t) - u_\theta(z_t, r, t)\| &= \left\| \int_t^{t+\Delta t} \partial_s u_\theta(z_t, r, s) ds \right\| \\ &\leq \int_t^{t+\Delta t} \Lambda_\theta ds = \Delta t \Lambda_\theta. \end{aligned}$$

Therefore using the assumption  $\|u_\theta\| \leq M_\theta$ ,

$$\|(II)\| \leq \Delta t M_\theta + \alpha_t \Delta t \Lambda_\theta.$$

Combine them and apply the triangle inequality:

$$\|\alpha_{t+\Delta t} e_{t+\Delta t} - \alpha_t e_t\| \leq \|z_{t+\Delta t} - z_t\| + \Delta t (M_\theta + \alpha_t \Lambda_\theta).$$

Since  $\alpha_t = t - r$ . Finally, we obtain the result by dividing both sides by  $\alpha_{t+\Delta t} = t + \Delta t - r > 0$ .  $\square$

## 7.5. Proof of Corollary 4.1

*Proof.* Following from the above theorem, we then have

$$\begin{aligned} \|e_{t_{k+1}}\| &\leq \frac{\alpha_{t_k}}{\alpha_{t_k} + \Delta t_k} \|e_{t_k}\| + \frac{\Delta t_k}{\alpha_{t_k} + \Delta t_k} (M^* + M_\theta + \alpha_{t_k} \Lambda_\theta) \\ &= (1 - \beta_k) \|e_{t_k}\| + \beta_k T_{t_k}. \end{aligned}$$

We consider cases  $\|e_{t_k}\| \leq T_{t_k}$  and  $\|e_{t_k}\| > T_{t_k}$ .

1. In the first case,  $\|e_{t_{k+1}}\| \leq (1 - \beta_k) T_{t_k} + \beta_k T_{t_k} = T_{t_k}$ .
2. In the second case, it directly follows

$$\|e_{t_{k+1}}\| = \|e_{t_k}\| - \beta_k (\|e_{t_k}\| - T_{t_k}) < \|e_{t_k}\| \quad (\beta_k > 0),$$

So we find  $\|e_{t_{k+1}}\| \leq \max\{\|e_{t_k}\|, T_{t_k}\}$ .  $\square$

## 7.6. Proof of Corollary 4.2

*Proof.* For each step  $t_k \rightarrow t_{k+1}$  with  $h_k := t_{k+1} - t_k$  the forward one-step bound in Theorem 4.1 gives

$$\|\alpha_{t_{k+1}} e_{t_{k+1}} - \alpha_{t_k} e_{t_k}\| \leq \|z_{t_{k+1}} - z_{t_k}\| + h_k (M_\theta + \alpha_{t_k} \Lambda_\theta).$$

and hence

$$\|\alpha_{t_{k+1}} e_{t_{k+1}} - \alpha_{t_k} e_{t_k}\| \leq h_k (M^* + M_\theta + \alpha_{t_k} \Lambda_\theta).$$

Summing  $k = 0, \dots, N - 1$  and telescoping yields

$$\|\alpha_1 e_1 - \alpha_t e_t\| \leq \sum_{k=0}^{N-1} h_k (M^* + M_\theta + \alpha_{t_k} \Lambda_\theta).$$

Taking the mesh max  $h_k \rightarrow 0$  gives the integral form

$$\alpha_1 \|e_1\| \leq \alpha_t \|e_t\| + \int_t^1 (M^* + M_\theta + \alpha_s \Lambda_\theta) ds.$$

We can compute these explicitly:

$$\begin{aligned} \int_t^1 (M^* + M_\theta) ds &= (1 - t)(M^* + M_\theta) \\ \int_t^1 \alpha_s ds &= \frac{1}{2} (\alpha_1^2 - \alpha_t^2). \end{aligned}$$

Hence

$$\alpha_1 \|e_1\| \leq \alpha_t \|e_t\| + (1 - t)(M^* + M_\theta) + \frac{1}{2} (\alpha_1^2 - \alpha_t^2) \Lambda_\theta.$$

Then, we divide  $\alpha_1 = 1 - r$ . For  $t = 1 - \eta$ , the last two terms are  $O(\eta)$ , giving  $\|e_1\| \leq \|e_{1-\eta}\| + O(\eta)$ .  $\square$
